# Supplementary material for: The deubiquitylase USP10 regulates integrin β1 and β5 and fibrotic wound healing
Source: Oxford University Press journal article supplement (doi:10.1242/jcs.204628), 2017-08-30
Supplement: jcs204628supp.pdf [file jcs204628supp.pdf]

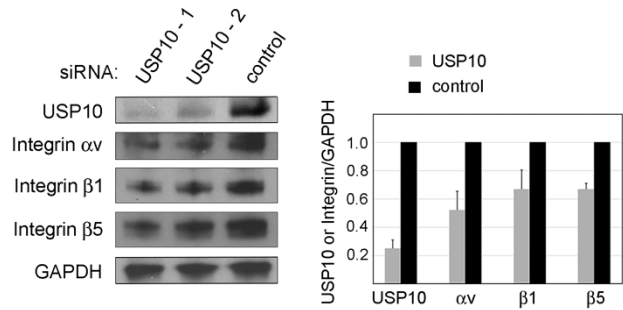

**Supplemental Fig 1.** HCFs were transfected with two unique USP10 siRNAs (Dharmacon), or control siRNA. After 48 hours, cells were lysed and Western blotted for USP10, integrins  $\alpha v$ ,  $\beta 1$ ,  $\beta 5$ , and GAPDH. The results of the knockdown using the two USP10 siRNAs were averaged. USP10 was decreased (75.1%  $\pm$  6.0%),  $\alpha v$  (47.8%  $\pm$  13.0%),  $\beta 1$  (33.2%  $\pm$  13.4%), and  $\beta 5$  (33.2%  $\pm$  4.2%). Representative blot is shown. N=3.

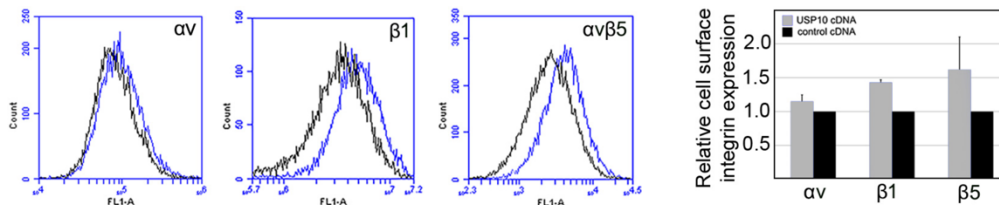

**Supplemental Fig 2. Flow cytometry analysis of cell-surface integrin levels after USP10 overexpression.** Flow cytometry for cell-surface integrin  $\alpha v$ ,  $\beta 1$ , and  $\alpha v\beta 5$ , (representative experiment shown), average increases-  $\alpha v$  (1.15  $\pm$  0.09),  $\beta 1$  (1.43  $\pm$  0.04) 1.62 fold  $\pm$  0.48) N=3.

|                             |                                                     |
|-----------------------------|-----------------------------------------------------|
| <b><math>\beta 1</math></b> | HDRREFAKFEKEKMNAKWDGTGENPIYKSAVTTVVNPKYEGK          |
| <b><math>\beta 3</math></b> | HDRKEFAKFEERARAKWDTANNPLYKEATSTFTNITYRGT            |
| <b><math>\beta 5</math></b> | HDRREFAKFQSERSRARYEMASNPLYRKPISTHTVDFTFNKFNKSYNGTVD |

**Supplemental Fig 3. The cytoplasmic tails of integrins  $\beta 1$ ,  $\beta 3$ , and  $\beta 5$ .** The lysines, which are potential sites for ubiquitination, are highlighted in blue.
